# Supplementary material for: Computational design of a two-photon excited FRET-based ratiometric fluorescent Cu2+ probe for living cell imaging
Source: Royal Society of Chemistry journal article supplement (doi:10.1039/c5ra18393f), 2015-01-01
Supplement: c5ra18393f1.pdf [file c5ra18393f1.pdf]

# Computational Design of A Two-Photon Excited FRET-Based Ratiometric Fluorescent Cu<sup>2+</sup> Probe for Living Cell Imaging

Dan Wang,<sup>a</sup> Ai-Min Ren,<sup>\*,a</sup> Jing-Fu Guo,<sup>b</sup> Lu-Yi Zou,<sup>a</sup> Shuang Huang<sup>c</sup>

<sup>a</sup> Institute of Theoretical Chemistry, Jilin University, Changchun 130023, People's Republic of China

<sup>b</sup> School of Physics, Northeast Normal University, Changchun 130021, People's Republic of China

<sup>c</sup> School of Mathematics and Physics, Changzhou University, Changzhou 213164, People's Republic of China

## Table of Contents

Figure S1. Optimized ground-state geometries

Table S1. OPA properties of studied molecules calculated by TDDFT method

Figure S2. Optimized geometries in the first excited state

Table S2. Fluorescence properties of studied molecules calculated by TDDFT method

Figure S3. The spectral overlap between the emission of **1** and the absorption of **b**

Figure S4. The spectral overlap between the emission of **2** and the absorption of **b**

Table S3. The detail data of TPA properties of studied molecules

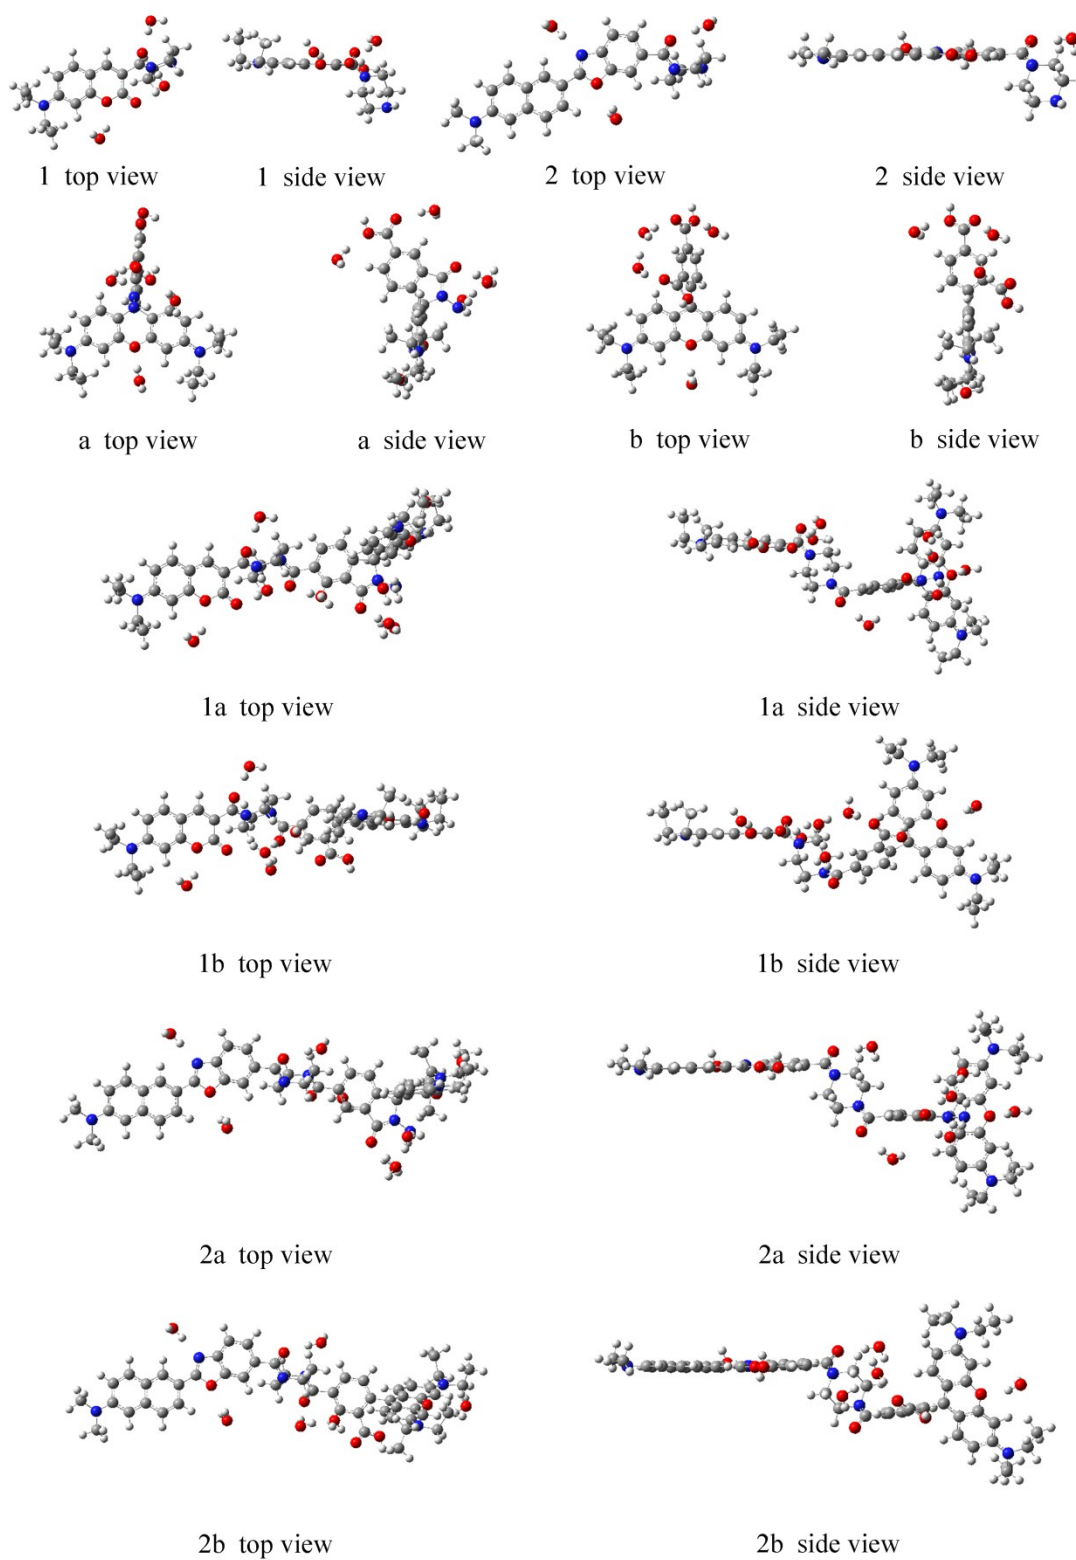

Figure S1. Optimized ground-state geometries of the studied molecules.

Table S1. OPA properties of studied molecules calculated by TDDFT method

| Molecules | $\lambda_{\text{max}}^{\text{O}}/\text{nm}$ | $f^{\text{O}}$ |                                     | Transition nature                                        | EXP/nm |
|-----------|---------------------------------------------|----------------|-------------------------------------|----------------------------------------------------------|--------|
| <b>1</b>  | 421.90                                      | 0.4870         | $\text{S}_0 \rightarrow \text{S}_2$ | H $\rightarrow$ L (56.6%), H-1 $\rightarrow$ L (39.2%)   | 410    |
| <b>2</b>  | 448.85                                      | 0.7131         | $\text{S}_0 \rightarrow \text{S}_2$ | H $\rightarrow$ L (61.4%), H-1 $\rightarrow$ L (36.8%)   |        |
| <b>a</b>  | 348.77                                      | 0.2110         | $\text{S}_0 \rightarrow \text{S}_7$ | H $\rightarrow$ L+2 (95.8%)                              |        |
| <b>b</b>  | 541.84                                      | 0.6741         | $\text{S}_0 \rightarrow \text{S}_2$ | H $\rightarrow$ L (96.6%)                                | 560    |
| <b>1a</b> | 428.15                                      | 0.7401         | $\text{S}_0 \rightarrow \text{S}_5$ | H-2 $\rightarrow$ L (92.9%)                              | 410    |
| <b>1b</b> | 534.00                                      | 0.7508         | $\text{S}_0 \rightarrow \text{S}_2$ | H-1 $\rightarrow$ L (98.0%)                              | 560    |
|           | 428.74                                      | 0.6649         | $\text{S}_0 \rightarrow \text{S}_6$ | H $\rightarrow$ L+1 (84.7%), H $\rightarrow$ L+2 (7.5%)  | 410    |
| <b>2a</b> | 449.39                                      | 0.9293         | $\text{S}_0 \rightarrow \text{S}_3$ | H-2 $\rightarrow$ L (98.2%)                              |        |
| <b>2b</b> | 538.54                                      | 0.7340         | $\text{S}_0 \rightarrow \text{S}_2$ | H-2 $\rightarrow$ L (57.0%), H-1 $\rightarrow$ L (41.9%) |        |
|           | 449.99                                      | 0.9300         | $\text{S}_0 \rightarrow \text{S}_5$ | H $\rightarrow$ L+1 (96.7%)                              |        |

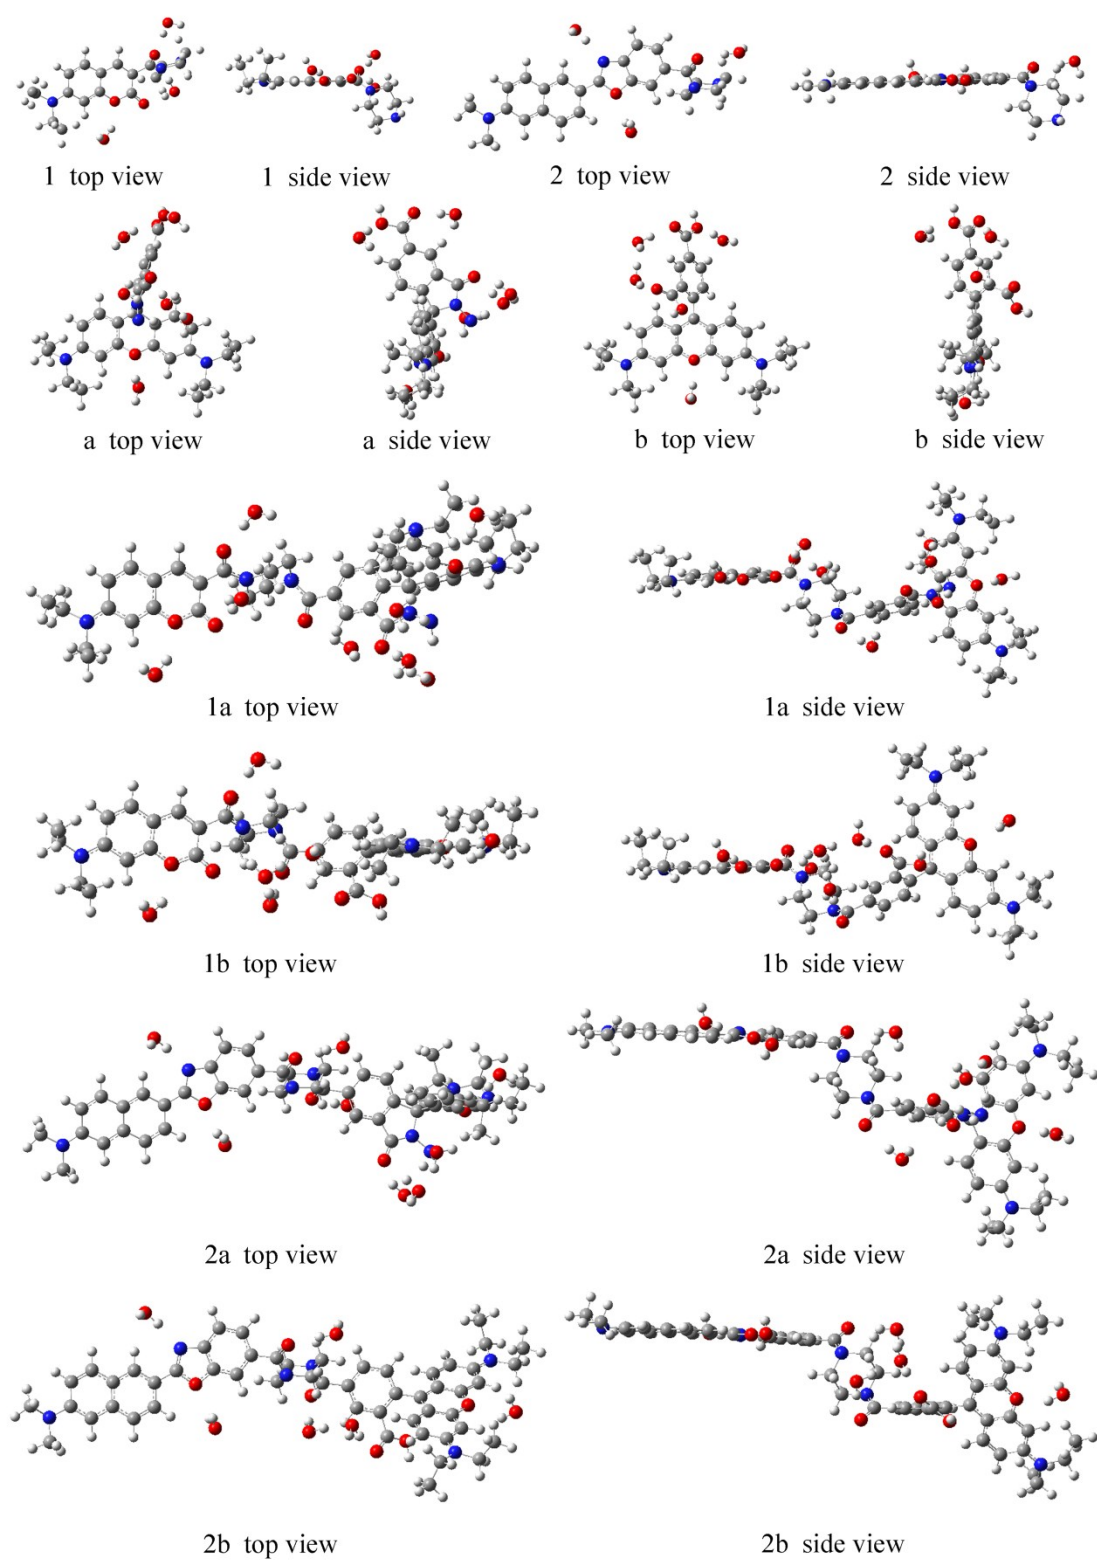

Figure S2. Optimized geometries in the first excited state of the studied molecules.

Table S2. Fluorescence properties of studied molecules calculated by TDDFT method

| Molecules | $\lambda_{max}^{flu}/\text{nm}$ | $f^F$  | Transition nature | $\Gamma/\text{ns}$ | EXP/nm |
|-----------|---------------------------------|--------|-------------------|--------------------|--------|
| <b>1</b>  | 465.60                          | 1.0946 | H→L (97.9%)       | 2.97               | 470    |
| <b>2</b>  | 501.08                          | 1.8031 | H→L (96.3%)       | 2.09               |        |
| <b>a</b>  | 471.94                          | 0.0105 | H→L (95.8%)       | ---                |        |
| <b>b</b>  | 630.12                          | 1.1998 | H→L (97.9%)       | 4.96               | 583    |
| <b>1a</b> | 465.94                          | 1.1241 | H-1→L (97.8%)     | 2.90               | 473    |
| <b>1b</b> | 612.64                          | 1.2679 | H-1→L (98.3%)     | 4.44               | 583    |
| <b>2a</b> | 502.58                          | 1.8142 | H→L (96.0%)       | 2.09               |        |
| <b>2b</b> | 613.82                          | 1.2648 | H-1→L (98.2%)     | 4.47               |        |

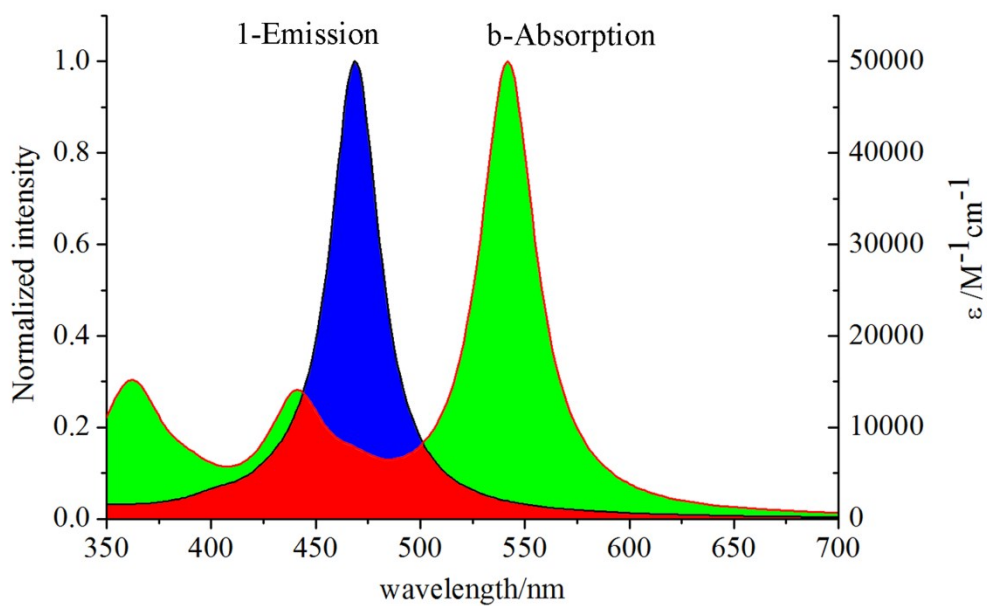

Figure S3. The spectral overlap between the emission of **1** and the absorption of **b**

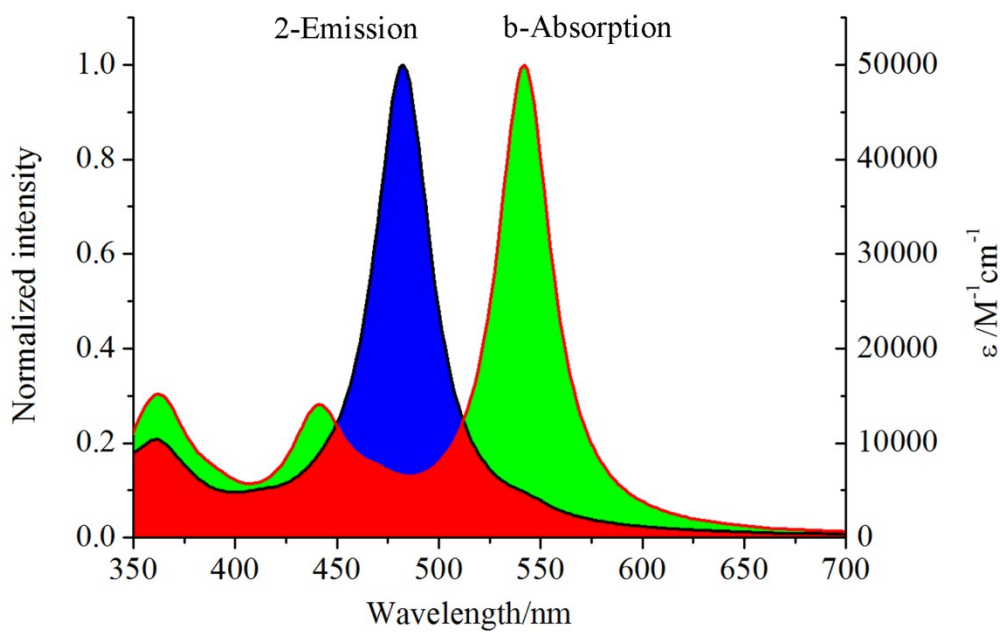

Figure S4. The spectral overlap between the emission of **2** and the absorption of **b**

Table S3. The detail data of TPA properties of studied molecules

| <b>1</b>  |              |                 |              | <b>2</b>     |                        |                        | <b>a</b>     |                 |              | <b>b</b>     |                 |              |
|-----------|--------------|-----------------|--------------|--------------|------------------------|------------------------|--------------|-----------------|--------------|--------------|-----------------|--------------|
| State     | <i>E</i> /eV | $\lambda^T$ /nm | $\delta$ /GM | <i>E</i> /eV | $\lambda^T$ /nm        | $\delta$ /GM           | <i>E</i> /eV | $\lambda^T$ /nm | $\delta$ /GM | <i>E</i> /eV | $\lambda^T$ /nm | $\delta$ /GM |
| 1         | 3.41         | 727.2           | 0.9          | <b>3.41</b>  | <b>727.2</b>           | <b>144.5</b>           | 3.35         | 740.2           | 37.7         | 2.75         | 901.7           | 10.0         |
|           |              |                 |              |              | <b>780<sup>a</sup></b> | <b>150<sup>a</sup></b> |              |                 |              |              |                 |              |
| <b>2</b>  | <b>3.55</b>  | <b>698.5</b>    | <b>12.5</b>  | 3.78         | 656.0                  | 75.4                   | 3.39         | 731.5           | 12.9         | <b>3.17</b>  | <b>782.2</b>    | <b>63.4</b>  |
| 3         | 3.93         | 630.9           | 50.5         | 3.85         | 644.1                  | 38.9                   | 3.78         | 656.0           | 4.9          | 3.63         | 683.1           | 8.3          |
| <b>1a</b> |              |                 |              | <b>1b</b>    |                        |                        | <b>2a</b>    |                 |              | <b>2b</b>    |                 |              |
| State     | <i>E</i> /eV | $\lambda^T$ /nm | $\delta$ /GM | <i>E</i> /eV | $\lambda^T$ /nm        | $\delta$ /GM           | <i>E</i> /eV | $\lambda^T$ /nm | $\delta$ /GM | <i>E</i> /eV | $\lambda^T$ /nm | $\delta$ /GM |
| 1         | 3.03         | 818.4           | 3.8          | 1.08         | 2296.0                 | 3.3                    | 3.34         | 742.4           | 0.6          | 0.58         | 4275.3          | 20.3         |
| 2         | 3.16         | 784.7           | 0.8          | 1.96         | 1265.2                 | 9.2                    | <b>3.37</b>  | <b>735.8</b>    | <b>227.5</b> | 1.59         | 1559.6          | 0.4          |
| 3         | <b>3.53</b>  | <b>702.5</b>    | <b>15.2</b>  | 2.25         | 1102.1                 | 12.3                   | 3.46         | 716.7           | 0.3          | 1.76         | 1408.9          | 11.6         |
| 4         |              |                 |              | 2.37         | 1046.3                 | 0.6                    |              |                 |              | 1.99         | 1246.1          | 8.3          |
| 5         |              |                 |              | 2.47         | 1003.9                 | 9.2                    |              |                 |              | 2.05         | 1209.6          | 19.4         |
| 6         |              |                 |              | 2.75         | 901.7                  | 3.7                    |              |                 |              | 2.3          | 1078.1          | 0.0          |
| 7         |              |                 |              | 2.77         | 895.2                  | 7.9                    |              |                 |              | 2.54         | 976.3           | 16.5         |
| 8         |              |                 |              | 2.88         | 861.0                  | 4.1                    |              |                 |              | 2.59         | 957.4           | 0.2          |
| 9         |              |                 |              | 3.03         | 818.4                  | 8.6                    |              |                 |              | 2.74         | 905.0           | 13.5         |
| 10        |              |                 |              | 3.13         | 792.2                  | 0.1                    |              |                 |              | 2.74         | 905.0           | 13.8         |
| 11        |              |                 |              | <b>3.19</b>  | <b>777.3</b>           | <b>48.3</b>            |              |                 |              | 2.89         | 858.0           | 27.7         |
| 12        |              |                 |              | 3.20         | 774.9                  | 15.3                   |              |                 |              | 3.00         | 826.6           | 0.0          |
| 13        |              |                 |              | 3.24         | 765.3                  | 4.2                    |              |                 |              | 3.06         | 810.4           | 1.6          |
| 14        |              |                 |              | 3.26         | 760.6                  | 11.2                   |              |                 |              | 3.06         | 810.4           | 0.4          |
| 15        |              |                 |              | <b>3.49</b>  | <b>710.5</b>           | <b>38.0</b>            |              |                 |              | 3.15         | 787.2           | 1.3          |
| 16        |              |                 |              |              |                        |                        |              |                 |              | 3.16         | 784.7           | 9.0          |
| 17        |              |                 |              |              |                        |                        |              |                 |              | <b>3.17</b>  | <b>782.2</b>    | <b>59.9</b>  |
| 18        |              |                 |              |              |                        |                        |              |                 |              | <b>3.25</b>  | <b>763.0</b>    | <b>359.9</b> |
| 19        |              |                 |              |              |                        |                        |              |                 |              | 3.26         | 760.6           | 37.0         |
| 20        |              |                 |              |              |                        |                        |              |                 |              | 3.26         | 760.6           | 0.2          |

a is from Ref. 62.
